# Supplementary material for: The electronic structures of non-metal (N, S) doped cobalt phosphide catalysts and the catalytic mechanism for the hydrogen evolution reaction of ammonia borane: a theoretical study
Source: Royal Society of Chemistry journal article supplement (doi:10.1039/d2nj04535d), 2022-12-21
Supplement: d2nj04535d1.pdf [file d2nj04535d1.pdf]

## Supplementary Information File

### **Electronic structure of non-metal (N, S) doped cobalt phosphide catalysts and catalytic mechanism for hydrogen evolution of ammonia borane: A theoretical study**

Dan Mao,<sup>a</sup> Jingbin Zhang,<sup>a</sup> Yang Wu,<sup>a</sup> Haichuan Qin,<sup>a</sup> Yan Zheng<sup>\*a</sup> and Lai-Cai Li,<sup>\*a</sup>

<sup>a</sup> *College of Chemistry and Material Science, Sichuan Normal University, Chengdu 610068, China*

Email: [zhengyanchem@163.com](mailto:zhengyanchem@163.com); [lilcmail@163.com](mailto:lilcmail@163.com)

## Content

**Fig. S1** Mechanism of hydrogen evolution 2D reaction scheme of  $\text{NH}_3\text{BH}_3$ .

**Fig. S2** General flow chart of  $\text{NH}_3\text{BH}_3$  reaction on CoP (101) plane.

**Fig. S3** General flow chart of  $\text{NH}_3\text{BH}_3$  reaction on S@CoP (101) plane.

**Fig. S4** Energy level diagrams of each pathway of  $\text{NH}_3\text{BH}_3$  dehydrogenation catalyzed by CoP (101).

**Fig. S5** Energy level diagrams of each pathway of  $\text{NH}_3\text{BH}_3$  dehydrogenation catalyzed by S@CoP (101).

**Fig. S6** The density of states (DOS). ((a), (b), (c) refer to CoP, N@CoP, S@CoP, respectively)

**Table S1** Bond length (nm) table of reaction process of  $\text{NH}_3\text{BH}_3$  on CoP (101) crystal plane.

**Table S2** Bond length (nm) table of reaction process of  $\text{NH}_3\text{BH}_3$  on S@CoP (101) crystal plane.

**Table S3** Each position energy ( $E$ ), relative energy ( $E_{rel}$ ) and activation energy ( $E_a$ ) of CoP catalyzed  $\text{NH}_3\text{BH}_3$  reaction process.

**Table S4** Each position energy ( $E$ ), relative energy ( $E_{rel}$ ) and activation energy ( $E_a$ ) of S@CoP catalyzed  $\text{NH}_3\text{BH}_3$  reaction process.

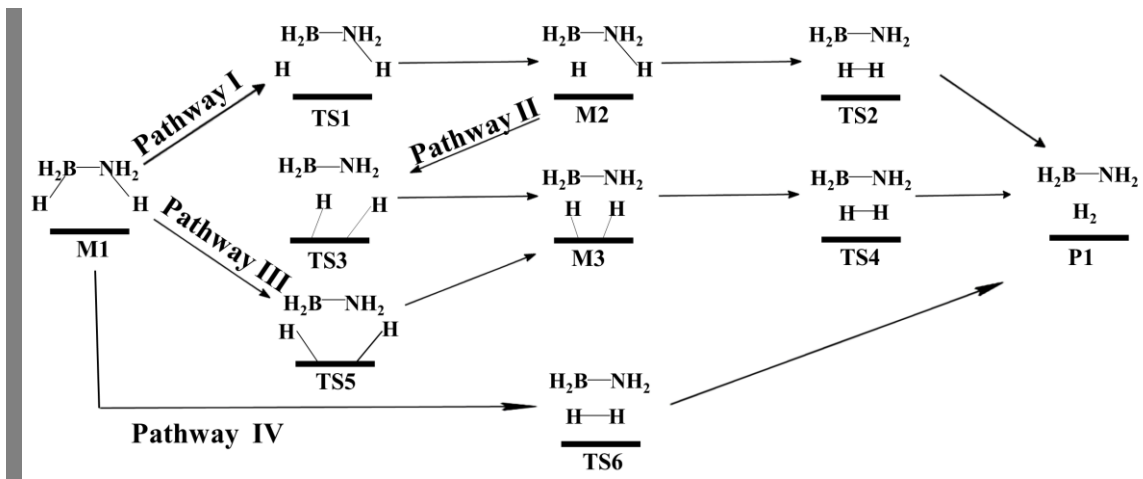

Fig. S1 Mechanism of hydrogen evolution 2D reaction scheme of  $\text{NH}_3\text{BH}_3$ .

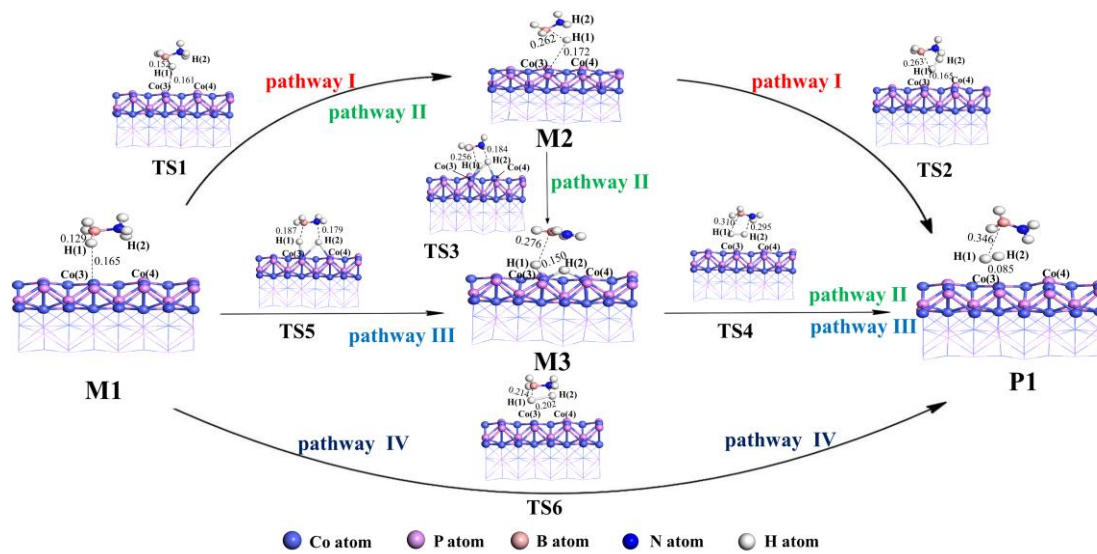

Fig. S2 General flow chart of  $\text{NH}_3\text{BH}_3$  reaction on CoP (101) plane.

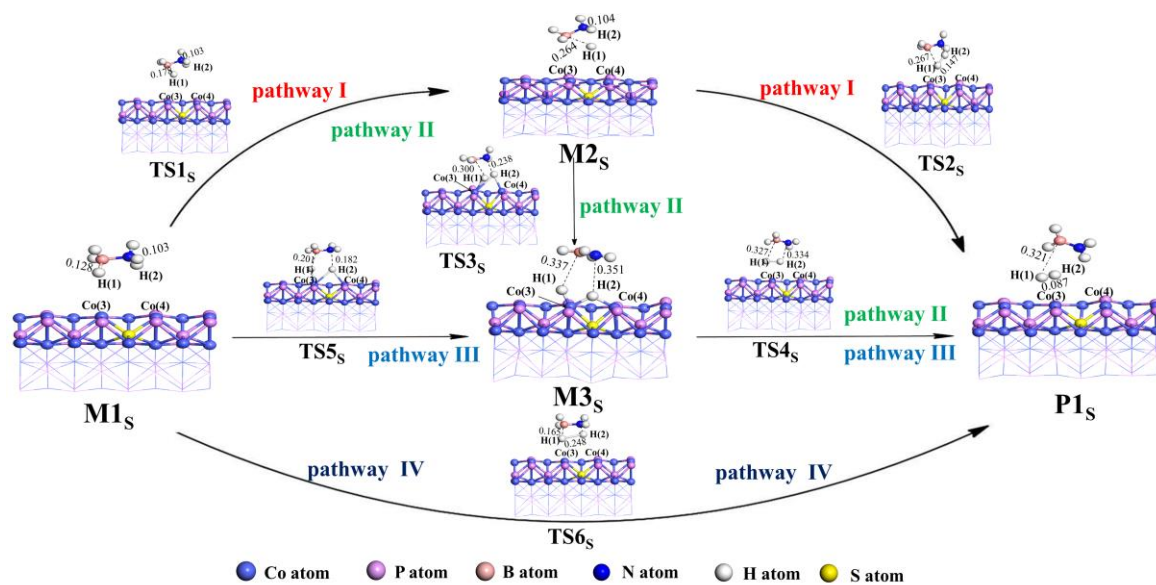

**Fig. S3** General flow chart of  $\text{NH}_3\text{BH}_3$  reaction on  $\text{S@CoP}$  (101) plane.

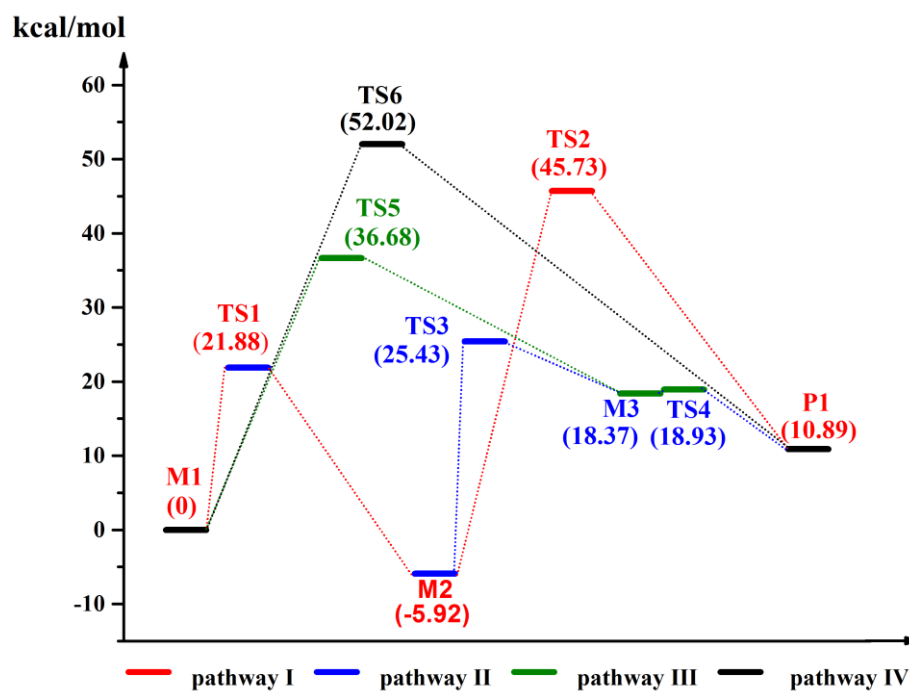

**Fig. S4** Energy level diagrams of each pathway of  $\text{NH}_3\text{BH}_3$  dehydrogenation catalyzed by  $\text{CoP}$  (101).

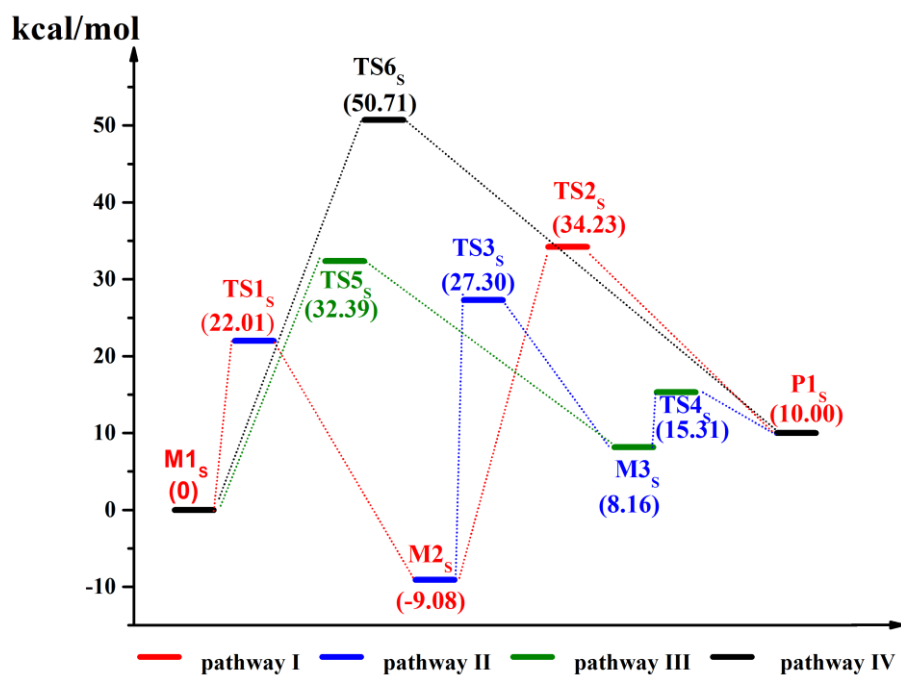

**Fig. S5** Energy level diagrams of each pathway of  $\text{NH}_3\text{BH}_3$  dehydrogenation catalyzed by S@CoP (101).

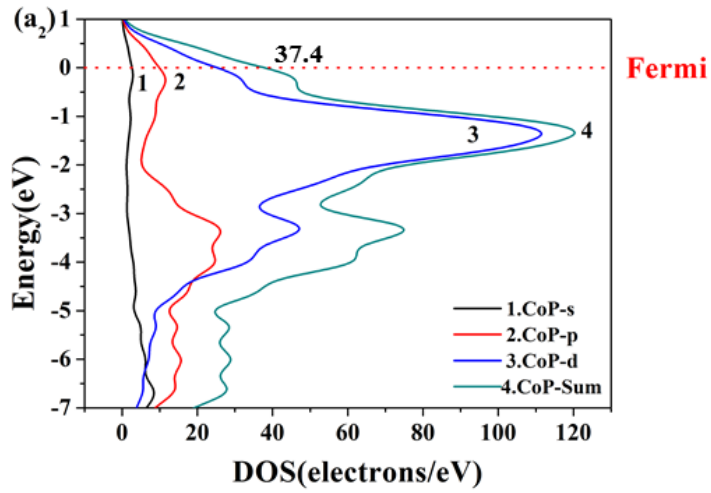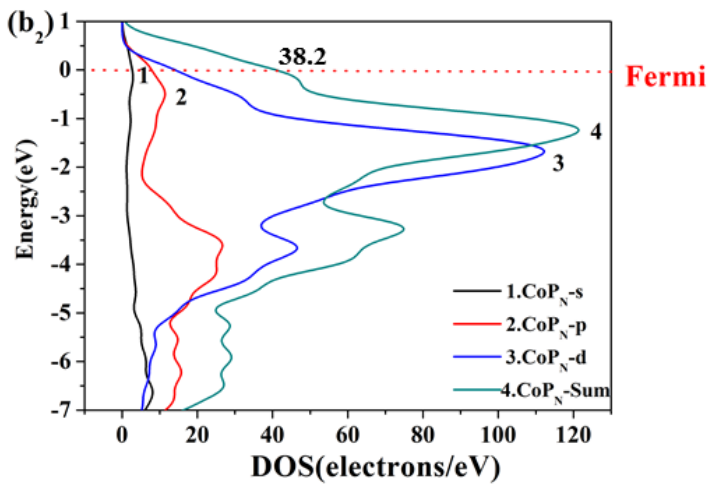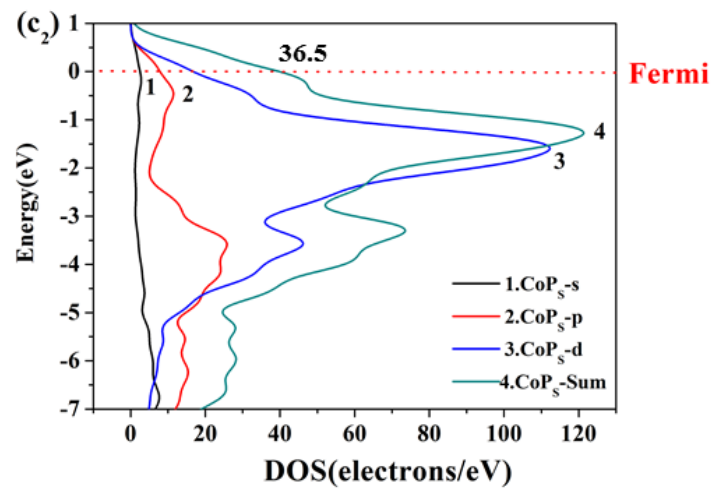

**Fig. S6** The density of states (DOS). ((a), (b), (c) refer to CoP, N@CoP, S@CoP, respectively)

**Table S1** Bond length (nm) table of reaction process of NH<sub>3</sub>BH<sub>3</sub> on CoP (101) crystal plane.

| Pathway  | Compound | B-H(1) | Co(3)-H(1) | N-H(2) | Co(3)-H(2) | Co(4)-H(2) | H(1)-H(2) |
|----------|----------|--------|------------|--------|------------|------------|-----------|
|          | s        |        |            |        |            |            |           |
| Path I   | M1       | 0.129  | 0.165      | 0.103  | 0.345      | 0.303      | 0.253     |
|          | TS1      | 0.152  | 0.161      | 0.103  | 0.345      | 0.305      | 0.231     |
|          | M2       | 0.262  | 0.172      | 0.103  | 0.305      | 0.309      | 0.193     |
|          | TS3      | 0.263  | 0.165      | 0.139  | 0.300      | 0.301      | 0.165     |
|          | M3       | 0.346  | 0.165      | 0.257  | 0.164      | 0.360      | 0.853     |
| Path II  | TS4      | 0.129  | 0.165      | 0.103  | 0.345      | 0.303      | 0.253     |
|          | P1       | 0.152  | 0.161      | 0.103  | 0.345      | 0.305      | 0.231     |
|          | M1       | 0.262  | 0.172      | 0.103  | 0.305      | 0.309      | 0.193     |
|          | TS5      | 0.256  | 0.171      | 0.184  | 0.285      | 0.240      | 0.171     |
|          | M3       | 0.276  | 0.150      | 0.316  | 0.168      | 0.173      | 0.208     |
|          | TS4      | 0.310  | 0.149      | 0.295  | 0.152      | 0.233      | 0.145     |
|          | P1       | 0.346  | 0.165      | 0.257  | 0.164      | 0.360      | 0.085     |
| Path III | M1       | 0.129  | 0.165      | 0.103  | 0.345      | 0.303      | 0.253     |
|          | P1       | 0.187  | 0.159      | 0.179  | 0.240      | 0.209      | 0.239     |
|          | M1       | 0.276  | 0.150      | 0.316  | 0.168      | 0.173      | 0.208     |
|          | TS1      | 0.310  | 0.149      | 0.295  | 0.152      | 0.233      | 0.145     |
|          | M2       | 0.346  | 0.165      | 0.257  | 0.164      | 0.360      | 0.085     |
| Path IV  | TS3      | 0.129  | 0.165      | 0.103  | 0.345      | 0.303      | 0.253     |
|          | M3       | 0.346  | 0.165      | 0.257  | 0.164      | 0.360      | 0.085     |
|          | TS4      | 0.129  | 0.165      | 0.103  | 0.345      | 0.303      | 0.253     |

**Table S2** Bond length (nm) table of reaction process of  $\text{NH}_3\text{BH}_3$  on S@CoP (101) crystal plane.

| Pathway  | Compounds        | B-H(1) | Co(3)-H(1) | N-H(2) | Co(3)-H(2) | Co(4)-H(2) | H(1)-H(2) |
|----------|------------------|--------|------------|--------|------------|------------|-----------|
| Path I   | M1 <sub>s</sub>  | 0.128  | 0.164      | 0.103  | 0.344      | 0.306      | 0.256     |
|          | TS1 <sub>s</sub> | 0.178  | 0.159      | 0.103  | 0.336      | 0.289      | 0.211     |
|          | M2 <sub>s</sub>  | 0.264  | 0.173      | 0.104  | 0.302      | 0.281      | 0.197     |
|          | TS2 <sub>s</sub> | 0.267  | 0.162      | 0.183  | 0.260      | 0.246      | 0.147     |
|          | P1 <sub>s</sub>  | 0.321  | 0.162      | 0.321  | 0.163      | 0.299      | 0.087     |
| Path II  | M1 <sub>s</sub>  | 0.128  | 0.164      | 0.103  | 0.344      | 0.306      | 0.256     |
|          | TS1 <sub>s</sub> | 0.178  | 0.159      | 0.103  | 0.336      | 0.289      | 0.211     |
|          | M2 <sub>s</sub>  | 0.264  | 0.173      | 0.104  | 0.302      | 0.281      | 0.197     |
|          | TS3 <sub>s</sub> | 0.300  | 0.187      | 0.238  | 0.295      | 0.160      | 0.167     |
|          | M3 <sub>s</sub>  | 0.337  | 0.152      | 0.351  | 0.171      | 0.173      | 0.24      |
|          | TS4 <sub>s</sub> | 0.327  | 0.155      | 0.334  | 0.167      | 0.224      | 0.180     |
|          | P1 <sub>s</sub>  | 0.321  | 0.162      | 0.321  | 0.163      | 0.299      | 0.087     |
| Path III | M1 <sub>s</sub>  | 0.128  | 0.164      | 0.104  | 0.315      | 0.306      | 0.277     |
|          | TS5 <sub>s</sub> | 0.201  | 0.158      | 0.182  | 0.249      | 0.215      | 0.257     |
|          | M3 <sub>s</sub>  | 0.337  | 0.152      | 0.351  | 0.171      | 0.173      | 0.24      |
|          | TS4 <sub>s</sub> | 0.327  | 0.155      | 0.334  | 0.167      | 0.224      | 0.180     |
|          | P1 <sub>s</sub>  | 0.321  | 0.162      | 0.321  | 0.163      | 0.299      | 0.087     |
| Path IV  | M1 <sub>s</sub>  | 0.128  | 0.164      | 0.104  | 0.315      | 0.306      | 0.277     |
|          | P1 <sub>s</sub>  | 0.321  | 0.162      | 0.321  | 0.163      | 0.299      | 0.087     |
|          | M1 <sub>s</sub>  | 0.128  | 0.164      | 0.103  | 0.344      | 0.306      | 0.256     |



**Table S3** Each position energy ( $E$ ), relative energy ( $E_{rel}$ ) and activation energy ( $E_a$ ) of CoP catalyzed  $\text{NH}_3\text{BH}_3$  reaction process.

| Pathway  | Intermediate/transition state | $E_r$    | $E_a$    |
|----------|-------------------------------|----------|----------|
|          |                               | kcal/mol | kcal/mol |
| Path I   | M1                            | 0.0      |          |
|          | TS1                           | 21.9     | 21.9     |
|          | M2                            | -5.9     |          |
|          | TS2                           | 45.7     | 51.7     |
|          | P1                            | 10.9     |          |
| Path II  | M1                            | 0.0      |          |
|          | TS1                           | 21.9     | 21.9     |
|          | M2                            | -5.9     |          |
|          | TS3                           | 25.4     | 31.4     |
|          | M3                            | 18.4     |          |
|          | TS4                           | 18.9     | 0.6      |
| Path III | P1                            | 10.9     |          |
|          | M1                            | 0.0      |          |
|          | TS5                           | 36.7     | 36.7     |
|          | M3                            | 18.4     |          |
|          | TS4                           | 18.9     | 0.6      |
| Path IV  | P1                            | 10.9     |          |
|          | M1                            | 0.0      |          |
|          | TS6                           | 52.0     | 52.0     |

**Table S4** Each position energy ( $E$ ), relative energy ( $E_{rel}$ ) and activation energy ( $E_a$ ) of S@CoP catalyzed  $\text{NH}_3\text{BH}_3$  reaction process.

| Pathway  | Intermediate/transition state | $E_r$    | $E_a$    |
|----------|-------------------------------|----------|----------|
|          |                               | kcal/mol | kcal/mol |
| Path I   | M1s                           | 0.0      |          |
|          | TS1s                          | 22.0     | 22.0     |
|          | M2s                           | -9.1     |          |
|          | TS2s                          | 34.2     | 43.3     |
|          | P1s                           | 10.0     |          |
| Path II  | M1s                           | 0.0      |          |
|          | TS1s                          | 22.0     | 22.0     |
|          | M2s                           | -9.1     |          |
|          | TS3s                          | 27.3     | 36.4     |
|          | M3s                           | 8.2      |          |
|          | TS4s                          | 15.3     | 7.2      |
| Path III | P1s                           | 10.0     |          |
|          | M1s                           | 0.0      |          |
|          | TS5s                          | 32.4     | 32.4     |
|          | M3s                           | 8.2      |          |
|          | TS4s                          | 15.3     | 7.2      |
| Path IV  | P1s                           | 10.0     |          |
|          | M1s                           | 0.0      |          |
|          | TS6s                          | 50.7     | 50.7     |
|          | P1s                           | 10.0     |          |
